# Supplementary material
Source: publisher site journal article supplement (https://www.spandidos-publications.com/7032/downloadSupplementary)
Supplement: Supplementary file 1 [file downloadSupplementary]

**Table SI.** Primer sequences.

| Gene     | Sequence, 5'→3'       |
|----------|-----------------------|
| GAPDH-F  | CCTCGTCCCGTAGACAAAATG |
| GAPDH-R  | TGAGGTCAATGAAGGGGTCGT |
| NSUN6-F  | CATGTCAGAGGTCTGCTGCT  |
| NSUN6-R  | GTCCAGTCATGGGGATGAGC  |
| UHRF1-F  | TGAGTGTGACATGGCCTTCC  |
| UHRF1-R  | GTGGCTGATGCCATCTTTGC  |
| TDG-F    | TACCCTGGGCCTGGAAATCA  |
| TDG-R    | GTA CTTGCCGGGTAAGGTGT |
| TET2-F   | TGTTGTCAGGGTGAGAATCCA |
| TET2-R   | TGGAGCAATGACAGTAGCCA  |
| NTHL1-F  | CTACGAAGGGGACATCCCTG  |
| NTHL1-R  | CACCTCAGTCGGTTGGCTAT  |
| NSUN5-F  | CACGAGCATCCACTCTACCG  |
| NSUN5-R  | GCTTAGCGTCCTGGTCGAAA  |
| DNMT3B-F | CCTGCCCCGCAAAGGTTTATA |
| DNMT3B-R | AATGGACGGTTGTCGCCCT   |
| MBD3-F   | AGCAACAAGGTCAAGAGCGA  |
| MBD3-R   | CAGGGTGCTGGTGTGTAGAG  |

F, forward; R, reverse; NSUN, NOP2/Sun RNA methyltransferase; UHRF, ubiquitin-like with plant homeodomain and ring finger; TDG, thymine DNA glycosylase; TET, ten-eleven translocation; NTHL, nth-like; DNMT3B, DNA methyltransferase 3 $\beta$ ; MBD3, methyl-CpG binding domain3.
